# Supplementary material for: Introduced, Mixed, and Peripheral: Conservation of Mitochondrial-DNA Lineages in the Wild Boar (Sus scrofa L.) Population in the Urals
Source: MDPI journal article supplement (doi:10.3390/d14110916), 2022-10-27
Supplement: s1 [file s1]

Archive with 3 entries (3 files):
- Supplement FigureS1.pdf
- Supplementary TableS2.xlsx
- Suppllementary_TableS1.xlsx
