# Supplementary material for: Introduced, Mixed, and Peripheral: Conservation of Mitochondrial-DNA Lineages in the Wild Boar (Sus scrofa L.) Population in the Urals
Source: MDPI journal article supplement (doi:10.3390/d14110916), 2022-10-27
Supplement: s1 [file s1 › Supplementary TableS2.xlsx]

## Sheet: Лист1
Table S2.List of mtDNA control region haplotypes used for phylogenetic analysis
Haplotypes	Haplotypes 547-bp	Origimal Haplotype's Name	GenBank Accession No.	Country	Location	Source	Clade	Correspondence
Ss1	DK1	Ss1	OP566396	Russia	Republic of Dagestan, Urals	This study	W2 European	H7 (Alves et al. (2010), Hap_48 (Choi et al. 2020) H1a, H2a, H2b (Niedziałkowska et al. 2021)
Ss2	DK2	Ss2	OP566397	Russia	Urals	This study	W2 European	haplotype 36 (Gongora et al. 2003), H3 (Niedziałkowska et al. 2021)
Ss3	DK1	Ss3	OP566398	Russia	Urals	This study	W2 European	H8a (Niedziałkowska et al. 2021)
Ss4	DK3	Ss4	OP566399	Russia	Urals	This study	W2 European
Ss5	DK4	Ss5	OP566400	Russia	Urals	This study	W2 European	Sus scrofa isolate 2 breed Turopolje (Cannon et al. 2015)
Ss6	DK5	Ss6	OP566401	Kazakhstan, Russia, Uzbekistan	Almaty & Balkhash regions, Zailiyskiy Alatau (Kazakhstan), Urals (Russia), Tashkent & Syr Darya regions (Uzbekistan)	This study	Asian	Hap_13 (Choi et al. 2020)
Ss7	DK6	Ss7	OP566402	Russia	Republic of Dagestan, Urals	This study	W1 Near-Eastern	H10 (Niedziałkowska et al. 2021)
Ss8	DK7	Ss8	OP566403	Russia	Urals	This study	W2 European	H11 (Alves et al. 2010)
Ss9	DK8	Ss9	OP566404	Russia, Uzbekistan	Urals (Russia), Tashkent region (Uzbekistan)	This study	Asian
Ss10	DK9	Ss10	OP566405	Kazakhstan, Uzbekistan	Almaty region & Zailiyskiy Alatau (Kazakhstan), Dzhizak & Tashkent regions (Uzbekistan)	This study	Asian
Ss11	DK10	Ss11	OP566406	Russia	Republic of Dagestan	This study	W1 Near-Eastern
Ss12	DK11	Ss12	OP566407	Kazakhstan	Zailiyskiy Alatau	This study	Asian
Ss13	DK12	Ss13	OP566408	Russia	Urals	This study	Asian	Sus scrofa breed Type II Lanyu (Wu et al. 2007)
Ss14	DK13	Ss14	OP566409	Russia	Urals	This study	W2 European	Hap_44 (Choi et al. 2020) H6 (Niedziałkowska et al. 2021)
Ss15	DK14	Ss15	OP566410	Russia	Far East	This study	Asian	Hap_01 (Choi et al. 2020)
Ss16	DK15	Ss16	OP566411	Russia	Far East	This study	Asian	CB (Larson et al. 2005)
Ss17	DK4	Ss17	OP566412	Russia	Far East	This study	W2 European	H3 (Alves et al. 2010)
Ss18	DK16	Ss18	OP566413	Russia	Far East	This study	Asian	GL237 (Larson et al. 2005)
Ss19	DK17	Ss19	OP566414	Russia	Far East	This study	Asian	Hap_02 (Choi et al. 2020)
Ss20	DK18	Ss20	OP566415	Russia	Far East	This study	Asian	FWB18 (Li et al. 2017), Hap_17 (Choi et al. 2020]
Ss21	DK19	Ss21	OP566416	Russia	Far East	This study	Asian	Hap_30 (Choi et al. 2020)
MON04	MON04	Hap_04	KY911562	Mongolia		Choi et al., 2020	Asian
MON05	MON05	Hap_05	KY911564	Mongolia		Choi et al., 2020	Asian
JNP06	JNP06	Hap_06	KY911568	Japan	Nagasaki Prefecture in Kyushu	Choi et al., 2020	Asian
JNP07	JNP07	Hap_07	KY911569	Japan	Tsushima Island in Kyushu	Choi et al., 2020	Asian
MON09	MON09	Hap_09	KY911577	Mongolia		Choi et al., 2020	Asian
MON10	MON10	Hap_10	KY911578	Mongolia		Choi et al., 2020	Asian
RU11	RU11	Hap_11	KY911579	Russia	Moscow region	Choi et al., 2020	Asian
JNP12	JNP12	Hap_12	KY911581	Japan	Fukui Prefecture in Honshu	Choi et al., 2020	Asian
CHI14	CHI14	Hap_14	KY911583	China	Yunnan	Choi et al., 2020	Asian
MON15	MON15	Hap_15	KY911586	Mongolia		Choi et al., 2020	Asian
MON16	MON16	Hap_16	KY911589	Mongolia		Choi et al., 2020	Asian
ChiT18	ChiT18	Hap_18	KY911591	Russia	Chitinskaya oblast	Choi et al., 2020	Asian
CHI19	CHI19	Hap_19	KY911592	China	Yunnan	Choi et al., 2020	Asian
JNP20	JNP20	Hap_20	KY911594	Japan	Miyazaki Prefecture in Kyushu	Choi et al., 2020	Asian
CHI21	CHI21	Hap_21	KY911595	China	Yunnan	Choi et al., 2020	Asian
VIE22	VIE22	Hap_22	KY911596	Vietnam		Choi et al., 2020	Asian
CHI23	CHI23	Hap_23	KY911598	China	Xinjiang	Choi et al., 2020	Asian
SKR24	SKR24	Hap_24	KY911599	S. Korea	Chungcheongnam-do	Choi et al., 2020	Asian
CHI25	CHI25	Hap_25	KY911600	China	Yunnan	Choi et al., 2020	Asian
CHI27	CHI27	Hap_27	KY911607	China	Yunnan	Choi et al., 2020	Asian
CHI28	CHI28	Hap_28	KY911608	China	Yunnan	Choi et al., 2020	Asian
SKR29	SKR29	Hap_29	KY911635	S. Korea	Jeju-do	Choi et al., 2020	Asian
SKR31	SKR31	Hap_31	KY911647	S. Korea	Gyeonggi-do	Choi et al., 2020	Asian
VIE32	VIE32	Hap_32	KY911656	Vietnam		Choi et al., 2020	SEA3
VIE33	VIE32	Hap_33	KY911657	Vietnam		Choi et al., 2020	SEA3
IND34	IND34	Hap_34	KY911660	Indonesia	Sumatra, Bengkulu	Choi et al., 2020	SEA3
IND35	IND34	Hap_35	KY911661	Indonesia	Flores, Larantuka	Choi et al., 2020	SEA3
IND36	IND36	Hap_36	KY911662	Indonesia	Sumbawa Besar	Choi et al., 2020	SEA3
IND37	IND37	Hap_37	KY911663	Indonesia	Sumbawa Besar	Choi et al., 2020	SEA3
SKR38	SKR38	Hap_38	KY911665	S. Korea	Gyeonggi-do	Choi et al., 2020	Asian
VIE39	VIE39	Hap_39	KY911667	Vietnam		Choi et al., 2020	Asian
SKR40	SKR40	Hap_40	KY911671	S. Korea	Gyeonggi-do	Choi et al., 2020	Asian
SKR41	SKR41	Hap_41	KY911688	S. Korea	Gangwon-do	Choi et al., 2020	Asian
SKR42	SKR42	Hap_42	KY911699	S. Korea	Gyeongsangbuk-do	Choi et al., 2020	Asian
DAG46	DAG46	Hap_46	KY911707	Russia	Caucasian mountains	Choi et al., 2020	W2 European
IND54	IND54	Hap_54	KY911730	Indonesia	Java, Purwokerto	Choi et al., 2020	SEA1
IND55	IND55	Hap_55	KY911732	Indonesia	Java, Bandung	Choi et al., 2020	SEA1
IND56	IND56	Hap_56	KY911737	Indonesia	Java, Pacitan	Choi et al., 2020	SEA2
IND57	IND57	Hap_57	KY911739	Indonesia	Java, Banjarnegara	Choi et al., 2020	SEA2
IND58	IND58	Hap_58	KY911742	Indonesia	Java, Banjarnegara	Choi et al., 2020	SEA2
HUNH2c	HUNH2c	H2c	MW842568.1	Hungary		Niedzialkowska et al., 2021	W2 European
HUNH15	HUNH15	H15	MW842567.1	Hungary		Niedzialkowska et al., 2021	W2 European
POLH14	POLH14	H14	MW842566.1	Poland		Niedzialkowska et al., 2021	W2 European
POLH13	POLH13	H13	MW842565.1	Poland		Niedzialkowska et al., 2021	W2 European
HUNH9	HUNH9	H9	MW842562.1	Hungary		Niedzialkowska et al., 2021	W2 European
POLH7	POLH7	H7	MW842561.1	Poland		Niedzialkowska et al., 2021	W2 European
POLH5	POLH5	H5	MW842559.1	Poland		Niedzialkowska et al., 2021	W2 European
POLH12	POLH12	H12	MW842557.1	Poland		Niedzialkowska et al., 2021	W2 European
POLH11	POLH11	H11	MW842556.1	Poland		Niedzialkowska et al., 2021	W2 European
POLH4b	POLH4b	H4b	MW842555.1	Poland		Niedzialkowska et al., 2021	W2 European
POLH4a	POLH4a	H4a	MW842554.1	Poland		Niedzialkowska et al., 2021	W2 European
	IRAN1	BQ	AY884638	Iran		Larson et al. 2005	Asian
	IRAN2	KHR9	KR075816	Iran	Khorasan Razavi- Quchan	Khalizadeh et al. 2016	Asian
	IRAN3	KHR8	KR075815	Iran	Khorasan Razavi- Quchan	Khalizadeh et al. 2016	Asian
	IRAN4	KHR1	KR075809	Iran	Khorasan Razavi- Mashhad	Khalizadeh et al. 2016	Asian
	IRAN5	GO5	KR075806	Iran	Golestan- Gorgan	Khalizadeh et al. 2016	Asian
	IRAN6	MA2	KR075790	Iran	Mazandaran- Kiasar	Khalizadeh et al. 2016	Asian
	IRAN7	GO1	KR075780	Iran	Qazvin- Alamout	Khalizadeh et al. 2016	W1 Near-Eastern
	IRAN8	ARD1	KR075767	Iran	Ardabil- Keshtosanate Mogan	Khalizadeh et al. 2016	W1 Near-Eastern
References
Alves et al. (2010) Genetic diversity of wild boar populations and domestic pig breeds (Sus scrofa) in South-western Europe, Biological Journal of the Linnean Society 101(4): 797–822, https://doi.org/10.1111/j.1095-8312.2010.01530.x
Cannon et al. (2015) Mitochondrial DNA sequence and phylogenetic evaluation of geographically disparate Sus scrofa breeds. Anim Biotechnol. 26(1):17-28. doi: 10.1080/10495398.2013.875474. PMID: 25153451.
Choi et al. (2020) Asia-wide phylogeography of wild boar (Sus scrofa) based on mitochondrial DNA and Y-chromosome: Revising the migration routes of wild boar in Asia. PLoS ONE 15(8): e0238049. https://doi.org/10.1371/journal.pone.0238049
Gongora et al. (2003) Analyses of possible domestic pig contribution in two populations of finnish farmed wild boar, Acta Agriculturae Scandinavica, Section A — Animal Science, 53:4, 161-165, DOI: 10.1080/09064710310010602
Khalilzadeh et al. (2016) Contact zone of Asian and European wild boar at North West of Iran. PLOS ONE 11(7): e0159499. https://doi.org/10.1371/journal.pone.0159499
Larson et al. (2005) Worldwide phylogeography of wild boar reveals multiple centers of pig domestication. Science. 307(5715):1618-21. doi: 10.1126/science.1106927. PMID: 15761152.
Li et al. (2017) Insular East Asia pig dispersal and vicariance inferred from Asian wild boar genetic evidence. J Anim Sci. 95(4):1451-1466. doi: 10.2527/jas.2016.1117. PMID: 28464072.
Niedziałkowska et al. (2021) Clear phylogeographic pattern and genetic structure of wild boar Sus scrofa population in Central and Eastern Europe. Sci Rep 11, 9680. https://doi.org/10.1038/s41598-021-88991-1
Wu et al. (2007) The type I Lanyu pig has a maternal genetic lineage distinct from Asian and European pigs. Anim Genet. 38(5):499-505. doi: 10.1111/j.1365-2052.2007.01646.x. PMID: 17894564.
