# Supplementary material for: Introduced, Mixed, and Peripheral: Conservation of Mitochondrial-DNA Lineages in the Wild Boar (Sus scrofa L.) Population in the Urals
Source: MDPI journal article supplement (doi:10.3390/d14110916), 2022-10-27
Supplement: s1 [file s1 › Suppllementary_TableS1.xlsx]

## Sheet: Лист1
Table S1. List of mtDNA control region sequences described in this study
Individual ID	Haplotypes	Haplotypes 547-bp	Clade	GenBank Accession No.	Country	Location
1006PR	Ss15	DK14	Asia	OP566410	Russia	Far East
1029PR	Ss16	DK15	Asia	OP566411	Russia	Far East
1030PR	Ss16	DK4	Asia	OP566411	Russia	Far East
1069PR	Ss16	DK15	Asia	OP566411	Russia	Far East
800PR	Ss15	DK14	Asia	OP566410	Russia	Far East
801PR	Ss16	DK15	Asia	OP566411	Russia	Far East
802PR	Ss17	DK4	W2: European	OP566412	Russia	Far East
803PR	Ss16	DK15	Asia	OP566411	Russia	Far East
804PR	Ss18	DK16	Asia	OP566413	Russia	Far East
805PR	Ss19	DK17	Asia	OP566414	Russia	Far East
806PR	Ss20	DK18	Asia	OP566415	Russia	Far East
807PR	Ss16	DK15	Asia	OP566411	Russia	Far East
808PR	Ss21	DK19	Asia	OP566416	Russia	Far East
809PR	Ss16	DK15	Asia	OP566411	Russia	Far East
810PR	Ss15	DK14	Asia	OP566410	Russia	Far East
811PR	Ss21	DK19	Asia	OP566416	Russia	Far East
812PR	Ss19	DK17	Asia	OP566414	Russia	Far East
813PR	Ss16	DK15	Asia	OP566411	Russia	Far East
819PR	Ss16	DK15	Asia	OP566411	Russia	Far East
824PR	Ss15	DK14	Asia	OP566410	Russia	Far East
829PR	Ss16	DK15	Asia	OP566411	Russia	Far East
836PR	Ss19	DK17	Asia	OP566414	Russia	Far East
855PR	Ss21	DK19	Asia	OP566416	Russia	Far East
856PR	Ss16	DK15	Asia	OP566411	Russia	Far East
862PR	Ss16	DK15	Asia	OP566411	Russia	Far East
863PR	Ss16	DK15	Asia	OP566411	Russia	Far East
864PR	Ss20	DK18	Asia	OP566415	Russia	Far East
884PR	Ss16	DK15	Asia	OP566411	Russia	Far East
887PR	Ss18	DK16	Asia	OP566413	Russia	Far East
888PR	Ss16	DK15	Asia	OP566411	Russia	Far East
889PR	Ss16	DK15	Asia	OP566411	Russia	Far East
890PR	Ss16	DK15	Asia	OP566411	Russia	Far East
891PR	Ss16	DK15	Asia	OP566411	Russia	Far East
892PR	Ss16	DK15	Asia	OP566411	Russia	Far East
907PR	Ss19	DK17	Asia	OP566414	Russia	Far East
952PR	Ss18	DK16	Asia	OP566413	Russia	Far East
978PR	Ss18	DK16	Asia	OP566413	Russia	Far East
981PR	Ss16	DK15	Asia	OP566411	Russia	Far East
D1	Ss1	DK1	W2: European	OP566396	Russia	Republic of Dagestan
D109	Ss1	DK1	W2: European	OP566396	Russia	Republic of Dagestan
D11	Ss1	DK1	W2: European	OP566396	Russia	Republic of Dagestan
D119	Ss1	DK1	W2: European	OP566396	Russia	Republic of Dagestan
D12	Ss1	DK1	W2: European	OP566396	Russia	Republic of Dagestan
D129	Ss1	DK1	W2: European	OP566396	Russia	Republic of Dagestan
D13	Ss1	DK1	W2: European	OP566396	Russia	Republic of Dagestan
D139	Ss1	DK1	W2: European	OP566396	Russia	Republic of Dagestan
D14	Ss1	DK1	W2: European	OP566396	Russia	Republic of Dagestan
D149	Ss11	DK10	W1:Near Eastern	OP566406	Russia	Republic of Dagestan
D19	Ss7	DK6	W1:Near Eastern	OP566402	Russia	Republic of Dagestan
D2	Ss7	DK6	W1:Near Eastern	OP566402	Russia	Republic of Dagestan
D29	Ss7	DK6	W1:Near Eastern	OP566402	Russia	Republic of Dagestan
D3	Ss7	DK6	W1:Near Eastern	OP566402	Russia	Republic of Dagestan
D39	Ss1	DK1	W2: European	OP566396	Russia	Republic of Dagestan
D4	Ss7	DK6	W1:Near Eastern	OP566402	Russia	Republic of Dagestan
D5	Ss7	DK6	W1:Near Eastern	OP566402	Russia	Republic of Dagestan
D59	Ss1	DK1	W2: European	OP566396	Russia	Republic of Dagestan
D6	Ss7	DK6	W1:Near Eastern	OP566402	Russia	Republic of Dagestan
D69	Ss7	DK6	W1:Near Eastern	OP566402	Russia	Republic of Dagestan
D7	Ss7	DK6	W1:Near Eastern	OP566402	Russia	Republic of Dagestan
D79	Ss7	DK6	W1:Near Eastern	OP566402	Russia	Republic of Dagestan
D8	Ss7	DK6	W1:Near Eastern	OP566402	Russia	Republic of Dagestan
D89	Ss7	DK6	W1:Near Eastern	OP566402	Russia	Republic of Dagestan
D9	Ss7	DK6	W1:Near Eastern	OP566402	Russia	Republic of Dagestan
D99	Ss7	DK6	W1:Near Eastern	OP566402	Russia	Republic of Dagestan
KZ1	Ss6	DK5	Asian	OP566401	Kazakhstan	Karatal river, Balkhash region
KZ10	Ss6	DK5	Asian	OP566401	Kazakhstan	Zailiyskiy Alatau
KZ11	Ss6	DK5	Asian	OP566401	Kazakhstan	Zailiyskiy Alatau
KZ2	Ss6	DK5	Asian	OP566401	Kazakhstan	Malovodnoye, Almaty region
KZ3	Ss10	DK9	Asian	OP566405	Kazakhstan	Narynkol, Almaty region
KZ4	Ss6	DK5	Asian	OP566401	Kazakhstan	Karaoy village, Naryn river, Almaty region
KZ5	Ss12	DK11	Asian	OP566407	Kazakhstan	Zailiyskiy Alatau
KZ6	Ss10	DK9	Asian	OP566405	Kazakhstan	Zailiyskiy Alatau
KZ8	Ss10	DK9	Asian	OP566405	Kazakhstan	Zailiyskiy Alatau
KZ9	Ss10	DK9	Asian	OP566405	Kazakhstan	Zailiyskiy Alatau
sv000	Ss2	DK2	W2: European	OP566397	Russia	Urals
sv1	Ss1	DK1	W2: European	OP566396	Russia	Urals
sv10	Ss2	DK2	W2: European	OP566397	Russia	Urals
sv101	Ss1	DK1	W2: European	OP566396	Russia	Urals
sv102	Ss2	DK2	W2: European	OP566397	Russia	Urals
sv103	Ss1	DK1	W2: European	OP566396	Russia	Urals
sv104	Ss2	DK2	W2: European	OP566397	Russia	Urals
sv105	Ss6	DK5	Asian	OP566401	Russia	Urals
sv106	Ss2	DK2	W2: European	OP566397	Russia	Urals
sv107	Ss1	DK1	W2: European	OP566396	Russia	Urals
sv108	Ss3	DK1	W2: European	OP566398	Russia	Urals
sv109	Ss2	DK2	W2: European	OP566397	Russia	Urals
sv11	Ss1	DK1	W2: European	OP566396	Russia	Urals
sv111	Ss2	DK2	W2: European	OP566397	Russia	Urals
sv112	Ss2	DK2	W2: European	OP566397	Russia	Urals
sv113	Ss2	DK2	W2: European	OP566397	Russia	Urals
sv114	Ss1	DK1	W2: European	OP566396	Russia	Urals
sv115	Ss1	DK1	W2: European	OP566396	Russia	Urals
sv116	Ss2	DK2	W2: European	OP566397	Russia	Urals
sv118	Ss2	DK2	W2: European	OP566397	Russia	Urals
sv119	Ss2	DK2	W2: European	OP566397	Russia	Urals
sv12	Ss2	DK2	W2: European	OP566397	Russia	Urals
sv120	Ss9	DK8	Asian	OP566404	Russia	Urals
sv121	Ss1	DK1	W2: European	OP566396	Russia	Urals
sv122	Ss2	DK2	W2: European	OP566397	Russia	Urals
sv124	Ss2	DK2	W2: European	OP566397	Russia	Urals
sv13	Ss2	DK2	W2: European	OP566397	Russia	Urals
sv130	Ss3	DK1	W2: European	OP566398	Russia	Urals
sv136	Ss2	DK2	W2: European	OP566397	Russia	Urals
sv137	Ss7	DK6	W1:Near Eastern	OP566402	Russia	Urals
sv139	Ss9	DK8	Asian	OP566404	Russia	Urals
sv14	Ss1	DK1	W2: European	OP566396	Russia	Urals
sv140	Ss2	DK2	W2: European	OP566397	Russia	Urals
sv142	Ss3	DK1	W2: European	OP566398	Russia	Urals
sv147	Ss4	DK3	W2: European	OP566399	Russia	Urals
sv15	Ss2	DK2	W2: European	OP566397	Russia	Urals
sv151	Ss2	DK2	W2: European	OP566397	Russia	Urals
sv152	Ss2	DK2	W2: European	OP566397	Russia	Urals
sv153	Ss2	DK2	W2: European	OP566397	Russia	Urals
sv155	Ss2	DK2	W2: European	OP566397	Russia	Urals
sv156	Ss1	DK1	W2: European	OP566396	Russia	Urals
sv158	Ss1	DK1	W2: European	OP566396	Russia	Urals
sv159	Ss2	DK2	W2: European	OP566397	Russia	Urals
sv16	Ss2	DK2	W2: European	OP566397	Russia	Urals
sv160	Ss2	DK2	W2: European	OP566397	Russia	Urals
sv161	Ss1	DK1	W2: European	OP566396	Russia	Urals
sv162	Ss1	DK1	W2: European	OP566396	Russia	Urals
sv163	Ss1	DK1	W2: European	OP566396	Russia	Urals
sv164	Ss1	DK1	W2: European	OP566396	Russia	Urals
sv166	Ss7	DK6	W1:Near Eastern	OP566402	Russia	Urals
sv167	Ss2	DK2	W2: European	OP566397	Russia	Urals
sv168	Ss2	DK2	W2: European	OP566397	Russia	Urals
sv169	Ss2	DK2	W2: European	OP566397	Russia	Urals
sv17	Ss2	DK2	W2: European	OP566397	Russia	Urals
sv170	Ss2	DK2	W2: European	OP566397	Russia	Urals
sv171	Ss2	DK2	W2: European	OP566397	Russia	Urals
sv173	Ss13	DK12	Asian	OP566408	Russia	Urals
sv175	Ss1	DK1	W2: European	OP566396	Russia	Urals
sv176	Ss1	DK1	W2: European	OP566396	Russia	Urals
sv177	Ss1	DK1	W2: European	OP566396	Russia	Urals
sv179	Ss13	DK12	Asian	OP566408	Russia	Urals
sv18	Ss2	DK2	W2: European	OP566397	Russia	Urals
sv180	Ss2	DK2	W2: European	OP566397	Russia	Urals
sv181	Ss1	DK1	W2: European	OP566396	Russia	Urals
sv182	Ss2	DK2	W2: European	OP566397	Russia	Urals
sv183	Ss1	DK1	W2: European	OP566396	Russia	Urals
sv188	Ss1	DK1	W2: European	OP566396	Russia	Urals
sv189	Ss1	DK1	W2: European	OP566396	Russia	Urals
sv190	Ss14	DK13	W2: European	OP566409	Russia	Urals
sv192	Ss2	DK2	W2: European	OP566397	Russia	Urals
sv2	Ss1	DK1	W2: European	OP566396	Russia	Urals
sv20	Ss1	DK1	W2: European	OP566396	Russia	Urals
sv21	Ss2	DK2	W2: European	OP566397	Russia	Urals
sv22	Ss1	DK1	W2: European	OP566396	Russia	Urals
sv23	Ss3	DK1	W2: European	OP566398	Russia	Urals
sv24	Ss2	DK2	W2: European	OP566397	Russia	Urals
sv25	Ss2	DK2	W2: European	OP566397	Russia	Urals
sv28	Ss2	DK2	W2: European	OP566397	Russia	Urals
sv36	Ss3	DK1	W2: European	OP566398	Russia	Urals
sv38	Ss2	DK2	W2: European	OP566397	Russia	Urals
sv39	Ss4	DK3	W2: European	OP566399	Russia	Urals
sv4	Ss2	DK2	W2: European	OP566397	Russia	Urals
sv40	Ss2	DK2	W2: European	OP566397	Russia	Urals
sv41	Ss5	DK4	W2: European	OP566400	Russia	Urals
sv42	Ss1	DK1	W2: European	OP566396	Russia	Urals
sv46	Ss2	DK2	W2: European	OP566397	Russia	Urals
sv5	Ss2	DK2	W2: European	OP566397	Russia	Urals
sv50	Ss1	DK1	W2: European	OP566396	Russia	Urals
sv51	Ss2	DK2	W2: European	OP566397	Russia	Urals
sv52	Ss2	DK2	W2: European	OP566397	Russia	Urals
sv53	Ss2	DK2	W2: European	OP566397	Russia	Urals
sv54	Ss1	DK1	W2: European	OP566396	Russia	Urals
sv56	Ss1	DK1	W2: European	OP566396	Russia	Urals
sv6	Ss2	DK2	W2: European	OP566397	Russia	Urals
sv61	Ss2	DK2	W2: European	OP566397	Russia	Urals
sv62	Ss2	DK2	W2: European	OP566397	Russia	Urals
sv63	Ss1	DK1	W2: European	OP566396	Russia	Urals
sv65	Ss6	DK5	Asian	OP566401	Russia	Urals
sv66	Ss6	DK5	Asian	OP566401	Russia	Urals
sv69	Ss2	DK2	W2: European	OP566397	Russia	Urals
sv7	Ss2	DK2	W2: European	OP566397	Russia	Urals
sv72	Ss7	DK6	W1:Near Eastern	OP566402	Russia	Urals
sv74	Ss7	DK6	W1:Near Eastern	OP566402	Russia	Urals
sv75	Ss3	DK1	W2: European	OP566398	Russia	Urals
sv8	Ss2	DK2	W2: European	OP566397	Russia	Urals
sv85	Ss1	DK1	W2: European	OP566396	Russia	Urals
sv86	Ss2	DK2	W2: European	OP566397	Russia	Urals
sv87	Ss8	DK7	W2: European	OP566403	Russia	Urals
sv88	Ss9	DK8	Asian	OP566404	Russia	Urals
sv9	Ss1	DK1	W2: European	OP566396	Russia	Urals
sv91	Ss1	DK1	W2: European	OP566396	Russia	Urals
sv92	Ss2	DK2	W2: European	OP566397	Russia	Urals
sv93	Ss9	DK8	Asian	OP566404	Russia	Urals
sv94	Ss1	DK1	W2: European	OP566396	Russia	Urals
sv98	Ss2	DK2	W2: European	OP566397	Russia	Urals
svXX	Ss1	DK1	W2: European	OP566396	Russia	Urals
U1	Ss10	DK9	Asian	OP566405	Uzbekistan	Arsanay lake, Dzhizak region
U2	Ss6	DK5	Asian	OP566401	Uzbekistan	Almalyk-say, Kuraminsky mountain ridge, Tashkent region
U3	Ss6	DK5	Asian	OP566401	Uzbekistan	Almalyk-say, Kuraminsky mountain ridge, Tashkent region
U4	Ss10	DK9	Asian	OP566405	Uzbekistan	Shavaz-say, Chatkalsky mountain ridge, Tashkent region
U5	Ss9	DK8	Asian	OP566404	Uzbekistan	Pskem river, Tashkent region
U6	Ss6	DK5	Asian	OP566401	Uzbekistan	Chinaz settlement, Syr Darya region
